# Supplementary material for: RNA splicing regulator EIF3D regulates the tumor microenvironment through immunogene-related alternative splicing in head and neck squamous cell carcinoma
Source: publisher site journal article supplement (doi:10.18632/aging.205681), 2024-03-25
Supplement: Supplementary file [file aging-v16i7-205681-supplementary-material-SD1.pdf]

**SUPPLEMENTARY FIGURES**

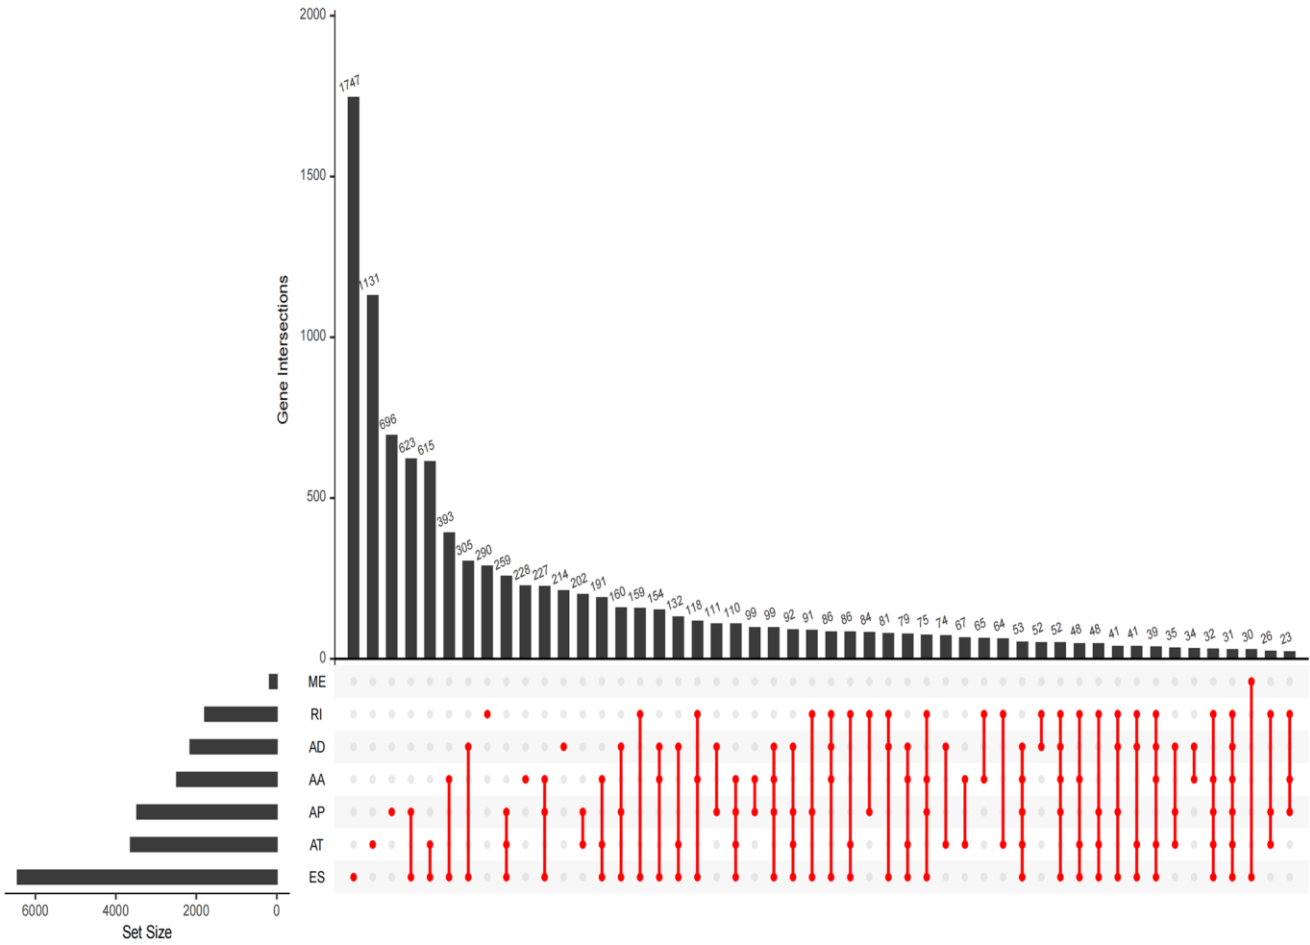

**Supplementary Figure 1. UpSet plot illustrating interactions among the seven AS types detected for all parent genes of HNSC.**

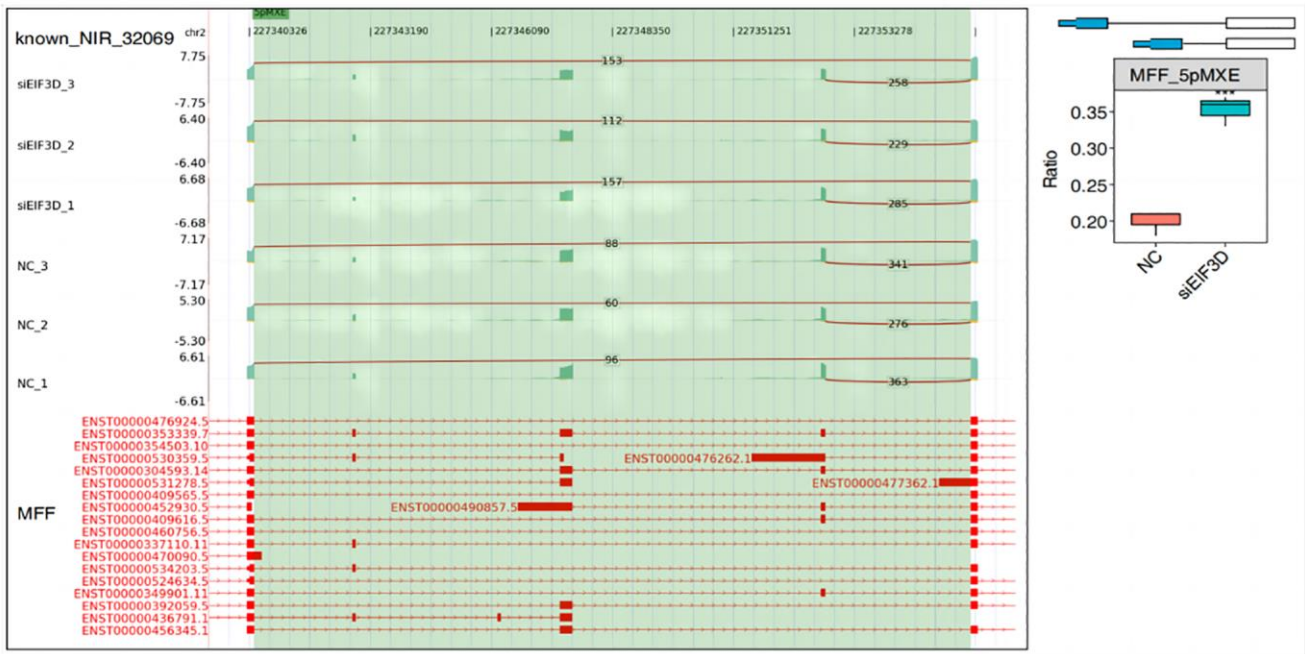

**Supplementary Figure 2. Schematic diagrams depicting the structures of AEs.** RNA-seq validation of AEs is displayed at the bottom of the right panel.

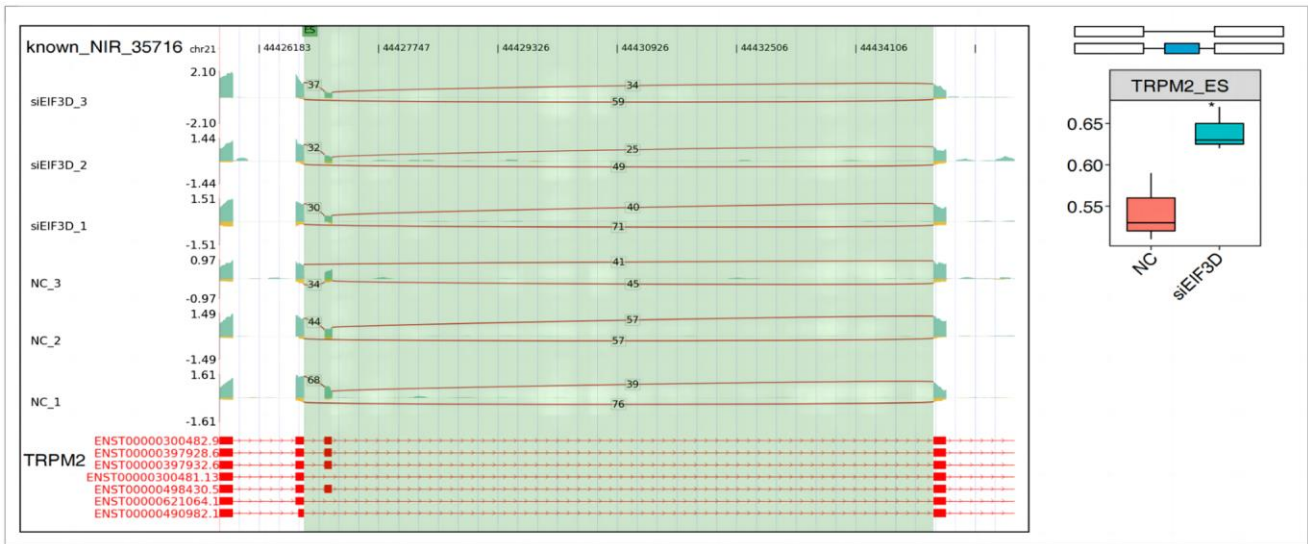

**Supplementary Figure 3. Schematic diagrams depicting the structures of AEs.** RNA-seq validation of AEs is displayed at the bottom of the right panel.
