# Supplementary material for: RNA splicing regulator EIF3D regulates the tumor microenvironment through immunogene-related alternative splicing in head and neck squamous cell carcinoma
Source: publisher site journal article supplement (doi:10.18632/aging.205681), 2024-03-25
Supplement: Supplementary file [file aging-v16i7-205681-supplementary-material-SD2.pdf]

## SUPPLEMENTARY TABLE

Supplementary Table 1. RT-qPCR primers for gene expression qualification.

| Gene  | Primer  | Sequence (5'-3')      |
|-------|---------|-----------------------|
| GAPDH | Forward | GGTCGGAGTCAACGGATTG   |
|       | Reverse | GGAAGATGGTGATGGGATTTC |
| EIF3D | Forward | CCAACAAGCAGGTCATCC    |
|       | Reverse | TTCCTCTTCTTCTTCTCTTC  |
